# Supplementary material for: Clinical Risk Factors for Dysphagia and Esophageal Dysmotility in Systemic Sclerosis
Source: MDPI journal article supplement (doi:10.3390/jcm12103448), 2023-05-13
Supplement: s1 [file s1]

**Table S1.** Details of the penetration-aspiration scale and functional oral intake scale scores

| Penetration-Aspiration Scale       |                                                                                                              |
|------------------------------------|--------------------------------------------------------------------------------------------------------------|
| Score 1                            | Material does not enter the airway                                                                           |
| 2                                  | Material enters the airway, remains above the vocal folds, and is ejected from the airway                    |
| 3                                  | Material enters the airway, remains above the vocal folds, and is not ejected from the airway                |
| 4                                  | Material enters the airway, contacts the vocal folds, and is ejected from the airway                         |
| 5                                  | Material enters the airway, contacts the vocal folds, and is not ejected from the airway                     |
| 6                                  | Material enters the airway, passes below the vocal folds and is ejected into the larynx or out of the airway |
| 7                                  | Material enters the airway, passes below the vocal folds, and is not ejected from the trachea despite effort |
| 8                                  | Material enters the airway, passes below the vocal folds, and no effort is made to eject                     |
| Functional Oral Intake Scale Score |                                                                                                              |
| Level 1                            | Nothing by mouth                                                                                             |
| 2                                  | Tube dependent with minimal attempts of food or liquid                                                       |
| 3                                  | Tube dependent with consistent oral intake of food or liquid                                                 |
| 4                                  | Total oral diet of a single consistency                                                                      |
| 5                                  | Total oral diet of multiple consistencies but requiring special preparation or compensations                 |
| 6                                  | Total oral diet of multiple consistencies without special preparation but with specific food limitations     |
| 7                                  | total oral intake without restrictions                                                                       |
